# Supplementary material for: Improving quantitative analysis of cement elements in laser-induced breakdown spectroscopy through combining matrix matching with regression
Source: Royal Society of Chemistry journal article supplement (doi:10.1039/d3ja00306j), 2023-01-01
Supplement: d3ja00306j1.pdf [file d3ja00306j1.pdf]

## Supplementary Information

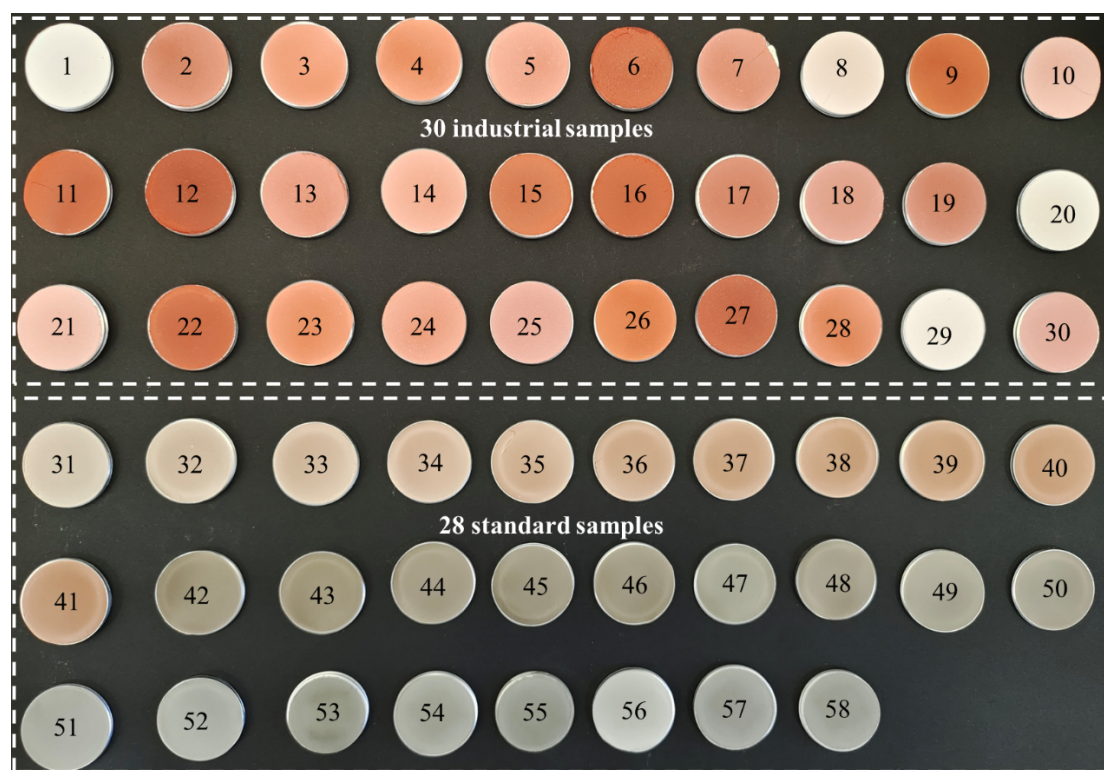

**Fig.S1** The 58 samples are arranged in ascending order from left to right and top to bottom according to their respective numbers.

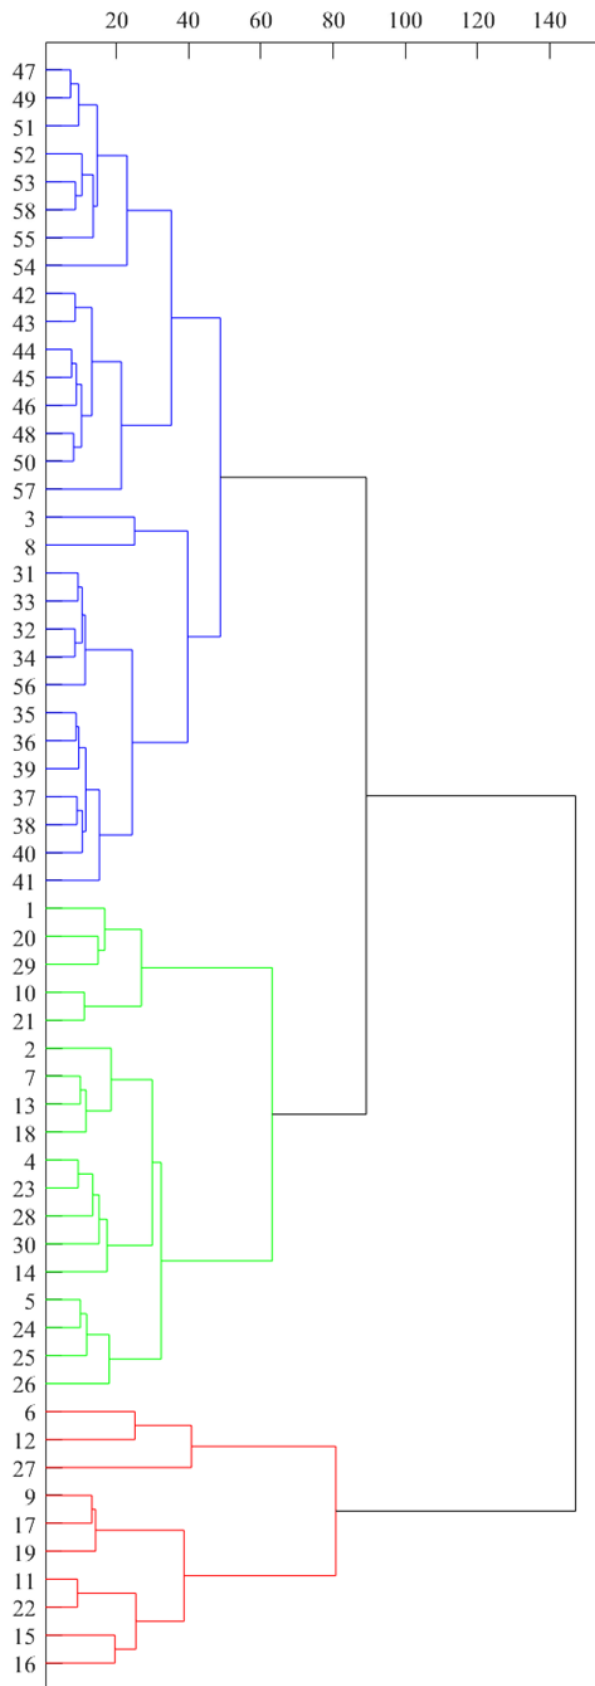

**Fig.S2** Dendrogram of 58 cement samples generated by hierarchical clustering.

**Table S1** The concentration information of target elements in 58 cement samples.

| Samples number | Ca (%) | Si (%) | Fe (%) | Al (%) | Mg (%) | K (%) |
|----------------|--------|--------|--------|--------|--------|-------|
| #1             | 53.78  | 1.14   | 0.05   | 0.09   | 1.33   | 0.04  |
| #2             | 41.79  | 13.00  | 2.96   | 3.33   | 2.23   | 0.33  |
| #3             | 34.42  | 14.18  | 1.42   | 0.78   | 5.18   | 0.94  |
| #4             | 45.09  | 11.77  | 2.42   | 2.24   | 1.26   | 0.11  |
| #5             | 38.80  | 16.59  | 1.51   | 4.74   | 1.78   | 0.61  |
| #6             | 20.45  | 38.65  | 6.74   | 7.69   | 1.07   | 1.85  |
| #7             | 39.22  | 13.41  | 2.15   | 3.83   | 2.85   | 1.30  |
| #8             | 28.65  | 28.51  | 0.08   | 6.55   | 5.73   | 0.05  |
| #9             | 32.40  | 20.28  | 6.15   | 7.11   | 2.08   | 0.30  |
| #10            | 38.84  | 21.15  | 0.49   | 3.22   | 1.03   | 1.30  |
| #11            | 40.63  | 11.94  | 7.22   | 2.85   | 1.03   | 1.04  |
| #12            | 30.05  | 13.47  | 14.50  | 2.38   | 3.53   | 1.49  |
| #13            | 27.60  | 28.84  | 1.69   | 6.76   | 2.11   | 1.83  |
| #14            | 36.08  | 26.30  | 1.03   | 2.09   | 1.58   | 0.32  |
| #15            | 28.12  | 32.16  | 3.79   | 4.77   | 2.32   | 0.39  |
| #16            | 19.44  | 42.09  | 5.87   | 5.91   | 2.74   | 0.50  |
| #17            | 35.42  | 12.20  | 3.04   | 3.04   | 3.05   | 2.57  |
| #18            | 44.99  | 10.01  | 2.00   | 0.13   | 2.00   | 0.04  |
| #19            | 42.78  | 4.13   | 2.55   | 4.08   | 4.10   | 1.56  |
| #20            | 53.68  | 1.14   | 0.05   | 0.09   | 1.33   | 0.04  |
| #21            | 38.74  | 21.25  | 0.48   | 3.32   | 1.08   | 1.32  |
| #22            | 40.23  | 11.54  | 7.28   | 2.75   | 1.13   | 1.05  |
| #23            | 45.29  | 11.72  | 2.33   | 2.28   | 1.22   | 0.14  |
| #24            | 38.77  | 16.61  | 1.49   | 4.64   | 1.74   | 0.54  |
| #25            | 38.26  | 14.33  | 1.45   | 4.16   | 2.20   | 0.95  |
| #26            | 40.77  | 13.32  | 2.91   | 3.60   | 1.03   | 1.93  |
| #27            | 25.56  | 18.70  | 9.13   | 7.51   | 2.90   | 2.19  |
| #28            | 41.92  | 14.17  | 1.94   | 3.28   | 1.94   | 0.17  |

---

|     |       |       |      |      |      |      |
|-----|-------|-------|------|------|------|------|
| #29 | 38.15 | 15.09 | 0.09 | 1.01 | 5.02 | 2.05 |
| #30 | 47.55 | 6.96  | 1.19 | 2.28 | 1.19 | 0.48 |
| #31 | 46.00 | 10.50 | 1.58 | 2.06 | 1.13 | 0.30 |
| #32 | 45.39 | 10.66 | 1.63 | 2.20 | 1.36 | 0.33 |
| #33 | 44.63 | 11.31 | 1.76 | 2.44 | 1.51 | 0.38 |
| #34 | 43.85 | 11.92 | 1.98 | 2.64 | 1.63 | 0.41 |
| #35 | 43.17 | 12.47 | 2.09 | 2.84 | 1.77 | 0.47 |
| #36 | 41.91 | 13.56 | 2.46 | 3.14 | 1.83 | 0.52 |
| #37 | 41.16 | 14.00 | 2.51 | 3.33 | 2.06 | 0.57 |
| #38 | 40.44 | 14.52 | 2.64 | 3.48 | 2.25 | 0.62 |
| #39 | 39.37 | 15.33 | 2.84 | 3.73 | 2.41 | 0.67 |
| #40 | 38.30 | 16.23 | 3.17 | 3.96 | 2.56 | 0.72 |
| #41 | 37.61 | 16.71 | 3.16 | 4.16 | 2.74 | 0.75 |
| #42 | 51.18 | 25.49 | 3.31 | 6.96 | 3.94 | 1.07 |
| #43 | 53.59 | 24.10 | 3.20 | 6.93 | 3.70 | 1.06 |
| #44 | 54.14 | 23.78 | 3.19 | 6.56 | 3.47 | 1.00 |
| #45 | 55.50 | 23.30 | 3.05 | 6.33 | 3.28 | 0.94 |
| #46 | 57.08 | 23.13 | 3.00 | 6.10 | 3.13 | 0.89 |
| #47 | 58.14 | 22.80 | 2.91 | 5.82 | 2.93 | 0.85 |
| #48 | 59.44 | 22.56 | 2.83 | 5.55 | 2.66 | 0.79 |
| #49 | 60.63 | 22.27 | 2.74 | 5.32 | 2.47 | 0.75 |
| #50 | 61.50 | 22.02 | 2.69 | 5.09 | 2.26 | 0.68 |
| #51 | 62.65 | 21.81 | 2.58 | 4.78 | 2.07 | 0.62 |
| #52 | 64.01 | 21.45 | 2.49 | 4.46 | 1.85 | 0.57 |
| #53 | 65.78 | 22.07 | 3.22 | 4.56 | 2.11 | 0.69 |
| #54 | 57.22 | 21.36 | 2.78 | 6.50 | 4.12 | 0.86 |
| #55 | 62.23 | 20.41 | 3.20 | 4.68 | 2.66 | 0.71 |
| #56 | 42.40 | 13.76 | 2.13 | 3.12 | 2.11 | 0.50 |
| #57 | 47.57 | 32.67 | 3.54 | 6.52 | 1.86 | 1.43 |

---

|          |        |       |       |      |      |      |
|----------|--------|-------|-------|------|------|------|
| #58      | 55.21  | 24.78 | 3.00  | 7.24 | 2.64 | 0.71 |
| Average  | 44.10  | 17.92 | 2.93  | 4.09 | 2.35 | 0.82 |
| Max.     | 65.78  | 42.09 | 14.50 | 7.69 | 5.73 | 2.57 |
| Min.     | 19.44  | 1.14  | 0.05  | 0.09 | 1.03 | 0.04 |
| Variance | 119.85 | 64.75 | 5.57  | 3.91 | 1.16 | 0.33 |

**Table S2** Number of latent variables (LVs) in the optimized PLSR model.

| Model             | Elements | LVs       |
|-------------------|----------|-----------|
| HC-PLSR Cluster 1 | Ca       | 7         |
|                   | Si       | 8         |
|                   | Fe       | 6         |
|                   | Al       | 6         |
|                   | Mg       | 8         |
|                   | K        | 7         |
| HC-PLSR Cluster 2 | Ca       | 10        |
|                   | Si       | 10        |
|                   | Fe       | 10        |
|                   | Al       | 10        |
|                   | Mg       | 6         |
|                   | K        | 10        |
| HC-PLSR Cluster 3 | Ca       | 10        |
|                   | Si       | 10        |
|                   | Fe       | 7         |
|                   | Al       | 9         |
|                   | Mg       | 10        |
|                   | K        | 10        |
| PLSR              | Ca       | <b>10</b> |
|                   | Si       | <b>13</b> |
|                   | Fe       | <b>14</b> |
|                   | Al       | <b>12</b> |
|                   | Mg       | <b>10</b> |
|                   | K        | <b>11</b> |
